# Supplementary material for: Cyanobiphenyl liquid crystal composites with gold nanoparticles
Source: Royal Society of Chemistry journal article supplement (doi:10.1039/c2ra21220j), 2012-11-15

**Graph 1.** Temperature versus time dependence of the peltier cooler/heater stage used for taking Movie1. This movie demonstrates the temperature variation of the formed clusters in 7CB/35% Gold system.

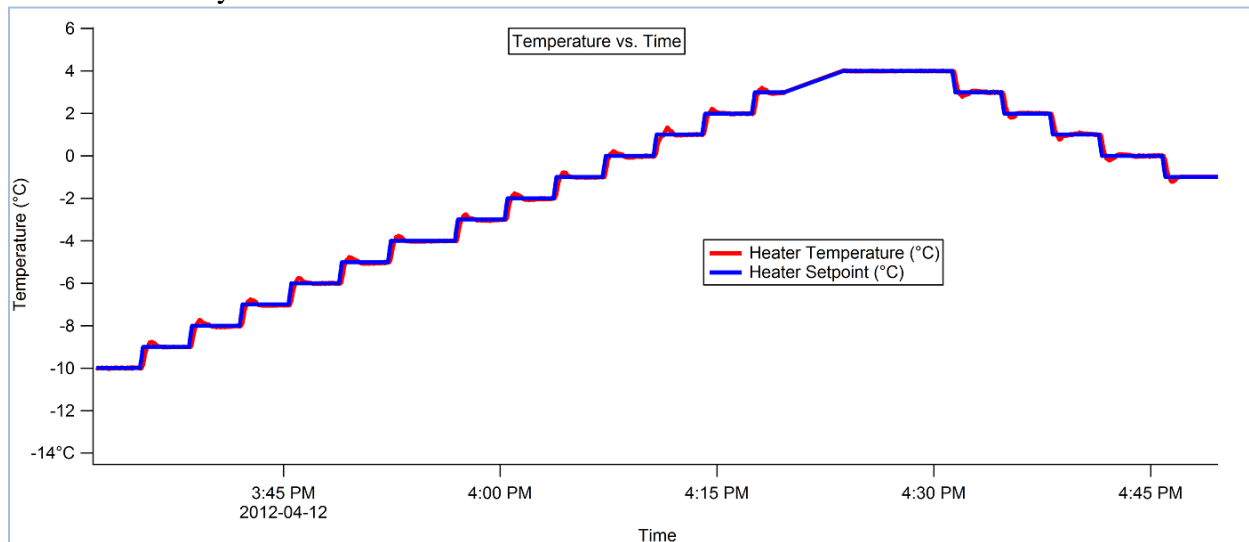

**Graph 2.** Temperature versus time dependence of the peltier cooler/heater stage used for taking Movie2 and Movie3. These movies demonstrate the melting and crystallization of 6CB/2% Gold system.

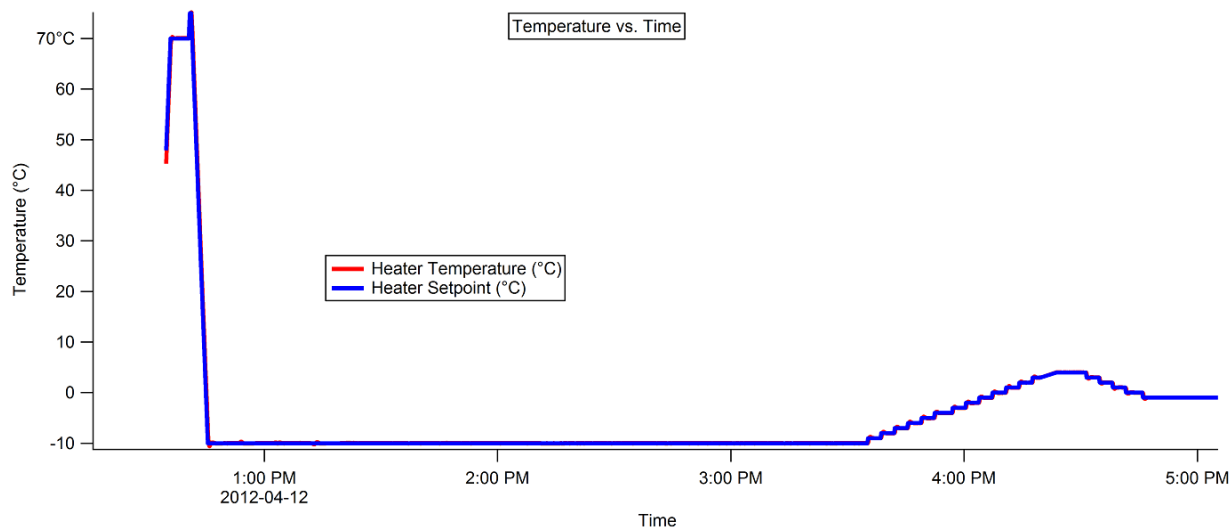

Supplement: c2ra21220j.pdf [file c2ra21220j.pdf]
